# Supplementary material for: Impact of Bicarbonate on PBP2a Production, Maturation, and Functionality in Methicillin-Resistant Staphylococcus aureus
Source: PubMed Central journal article supplement (PMC8092911; doi:10.1128/aac.02621-20), 2021-04-19
Supplement: AAC.02621-20-s0001.pdf [file AAC.02621-20-s0001.pdf]

**Figure S1**

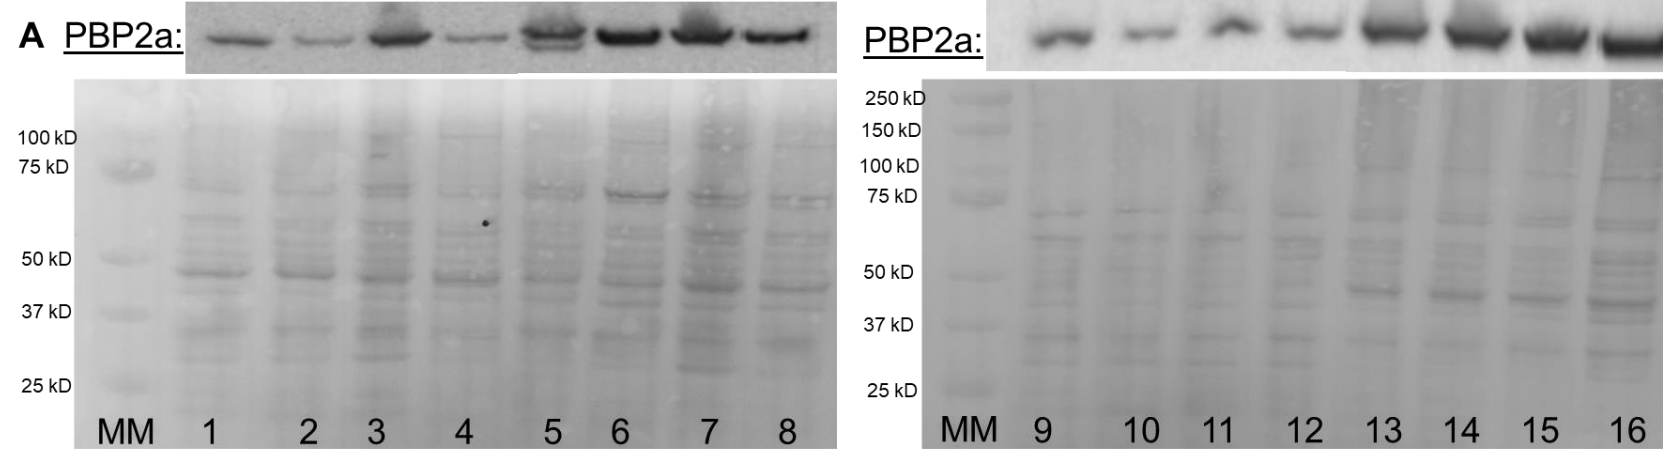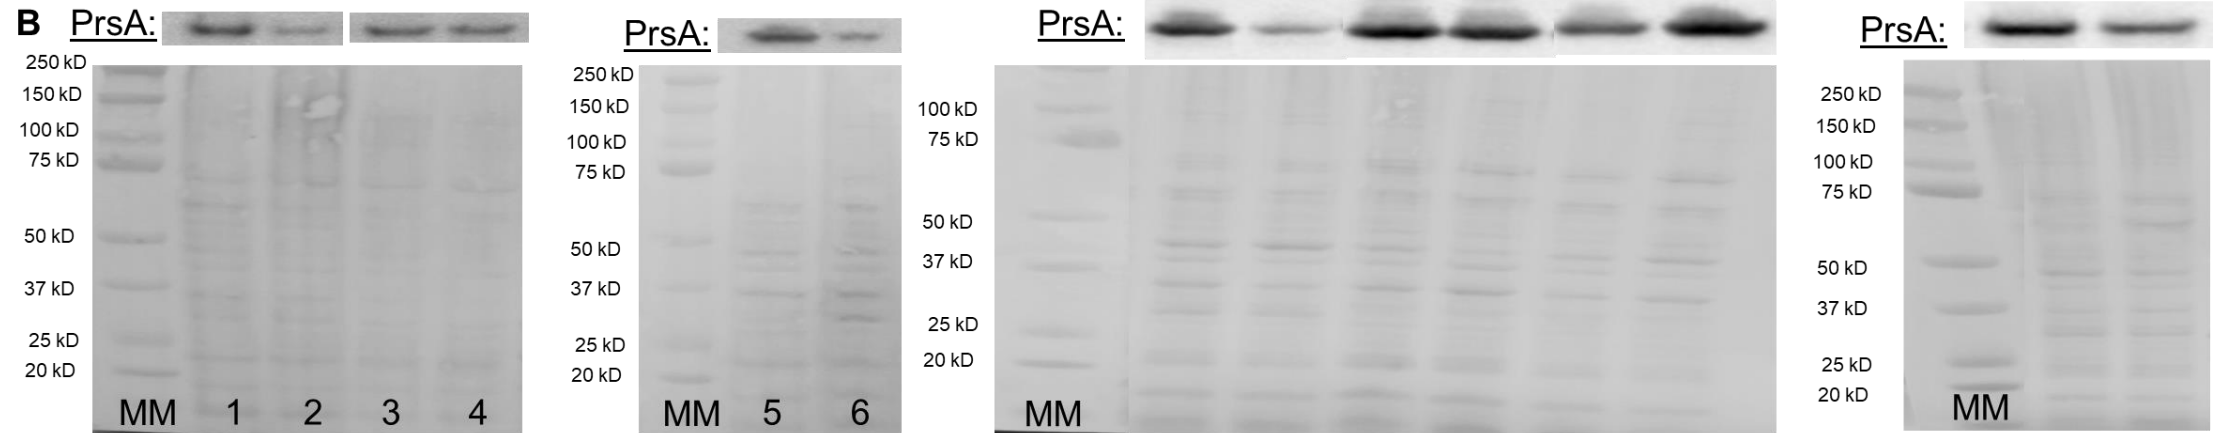

**Figure S1.** Total protein stain from PBP2a (**A**) and PrsA (**B**) Western blots. Cell membrane proteins were extracted from stationary phase cells. Lane numbers correspond to the following samples in panel A: (1) MRSA 11/11 w/o (2) MRSA 11/11 + NaHCO<sub>3</sub> (3) MW2 w/o (4) MW2 + NaHCO<sub>3</sub> (5) COL w/o (6) COL + NaHCO<sub>3</sub> (7) BMC1001 w/o (8) BMC1001 + NaHCO<sub>3</sub> (9) PB 043-043 w/o (10) PB 043-043 + NaHCO<sub>3</sub> (11) C24 w/o (12) C24 + NaHCO<sub>3</sub> (13) PB 027-133 w/o (14) PB 027-133 + NaHCO<sub>3</sub> (15) PB 017-037 w/o (16) PB 017-037 + NaHCO<sub>3</sub>. Lane numbers correspond to the following samples in panel B: (1) MRSA 11/11 w/o (2) MRSA 11/11 + NaHCO<sub>3</sub> (3) COL w/o (4) COL + NaHCO<sub>3</sub> (5) MW2 w/o (6) MW2 + NaHCO<sub>3</sub> (7) C24 w/o (8) C24 + NaHCO<sub>3</sub> (9) PB 027-133 w/o (10) PB 027-133 + NaHCO<sub>3</sub> (11) PB 017-037 w/o (12) PB 017-037 + NaHCO<sub>3</sub> (13) PB 043-043 w/o (14) PB 043-043 + NaHCO<sub>3</sub>

## Figure S2

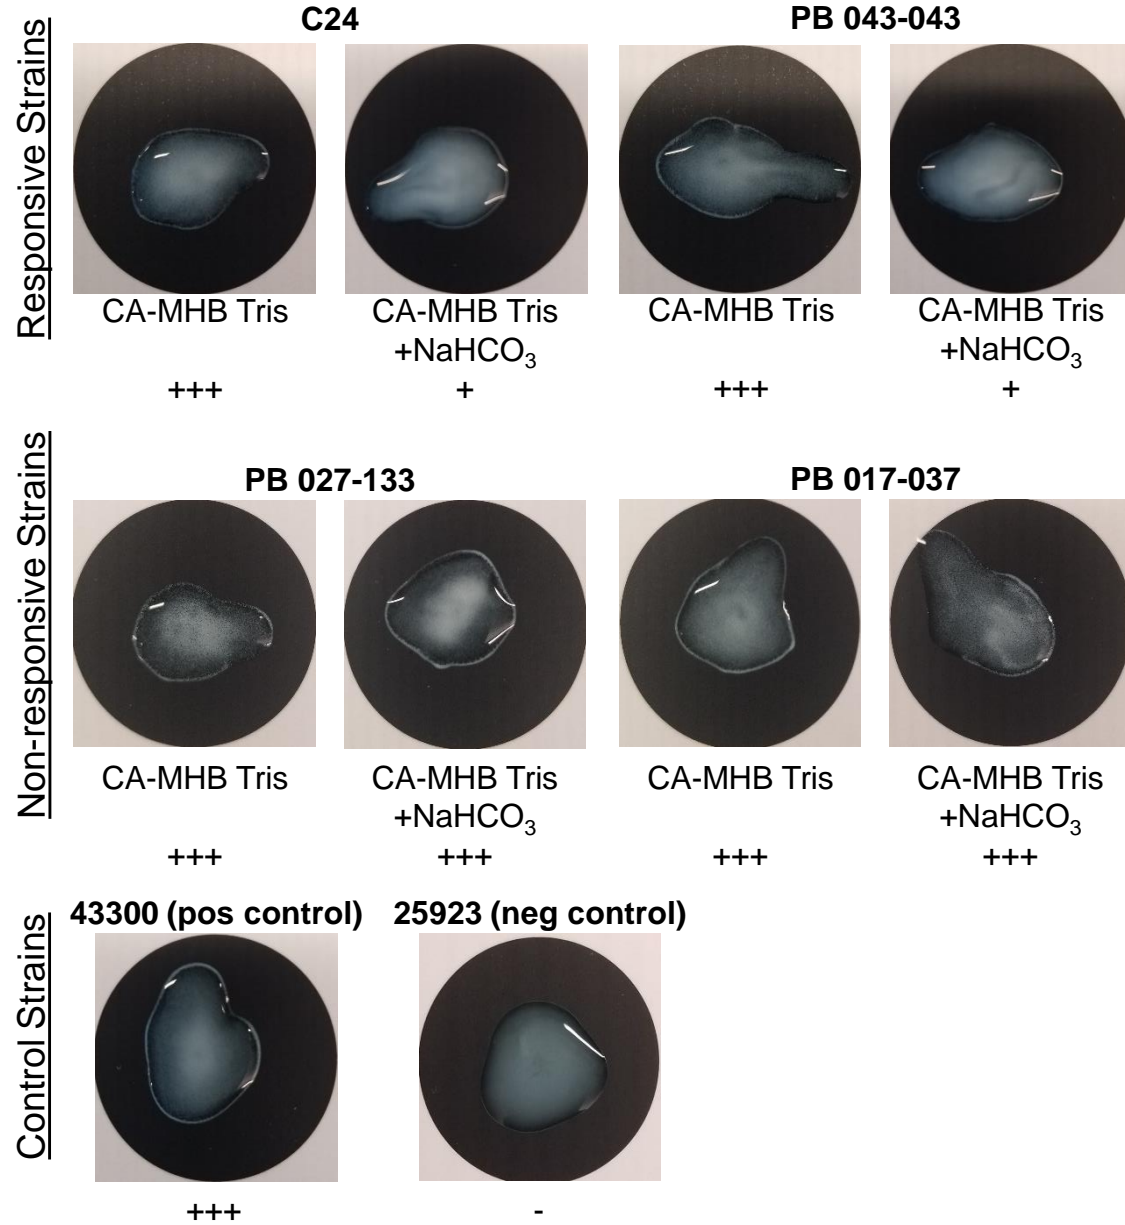

**Figure S2.** PBP2a agglutination of responsive (PB 043-043; C24) and non-responsive strains (PB 027-133; PB 017-037). Strains ATCC 43300 and ATCC 25923 were used as positive and negative controls, respectively.

**Table S1.** Oxacillin minimum inhibitory concentrations (MICs, mg/L) and clonal complex (CC) types of strains used in this study. In experiments in which sub-MIC concentrations of oxacillin were used, cells were exposed to 1/2 of the concentrations indicated in this table for each strain/condition.

| Strain     | Ca-MHB      | Ca-MHB 100 mM Tris       | CC Type |
|------------|-------------|--------------------------|---------|
|            | 100 mM Tris | 44 mM NaHCO <sub>3</sub> |         |
| MRSA 11/11 | 32          | 0.5                      | 8       |
| MW2        | 64          | 2                        | 1       |
| PB 043-043 | 16          | 1                        | 8       |
| C24        | 32          | 1                        | 8       |
| COL        | 512         | 512                      | 8       |
| BMC1001    | 256         | 256                      | 8       |
| PB 027-133 | 256         | 256                      | 5       |
| PB 017-037 | 32          | 32                       | 5       |

**Table S2.** Primers used in this study for qRT-PCR gene expression analyses.

| Gene Name    | Primer Sequences                                                          | Reference  |
|--------------|---------------------------------------------------------------------------|------------|
| <i>mecA</i>  | Fwd 5' TCCAGATTACAACCTTCACCAGG 3'<br>Rev 5' CCACTTCATATCTTGTAACG 3'       | 1          |
| <i>blaZ</i>  | Fwd 5' CTTTAAAAGAACTTATTGAGGCTTCA 3'<br>Rev 5' CCACCGATTTCTTTTATAATTT 3'  | This Study |
| <i>prsA</i>  | Fwd 5' AGTTAATGATAAGAAGATTGACGA 3'<br>Rev 5' GAAGGGCCTTTTCAAATTTATCTTT 3' | 2          |
| <i>vraSR</i> | Fwd 5' AATGGAAGGCGAAACAGTTG 3'<br>Rev 5' TCGCAACTTATGCAATTCTTG 3'         | This Study |
| <i>pbp4</i>  | Fwd 5' TGGTGCTAACTGCTTTGTAA 3'<br>Rev 5' GCTAAAGCTATCGGAATGAA 3'          | 3          |
| <i>floA</i>  | Fwd 5' CTAGTCCTGCTTTGTGCGCT 3'<br>Rev 5' TTAGCAGCTGGCGTTCATGT 3'          | 4          |
| <i>gyrB</i>  | Fwd 5' CGCAGGCGATTTTACCATTA 3'<br>Rev 5' GCTTTCGCTAGATCAAAGTCG 3'         | 5          |
| <i>rpoB</i>  | Fwd 5' CTA AGC ACA GAG GTC GT 3'<br>Rev 5' ACG GCA TCC TCA TAG T 3'       | 6          |

## SUPPLEMENTAL REFERENCES

1. Li L, Cheung A, Bayer AS, Chen L, Abdelhady W, Kreiswirth BN, Yeaman MR, Xiong YQ. 2016. The global regulon *sarA* regulates beta-Lactam antibiotic resistance in methicillin-resistant *Staphylococcus aureus in vitro* and in endovascular infections. *J Infect Dis* 214:1421-1429.
2. Jouselin A, Manzano C, Biette A, Reed P, Pinho M, Rosato A, Kelley WL, Renzoni A. 2015. The *Staphylococcus aureus* chaperone PrsA is a new auxiliary factor of oxacillin resistance affecting penicillin-binding protein 2A. *Antimicrob Agents Chemother: AAC*. 02333-15.
3. Dumitrescu O, Choudhury P, Boisset S, Badiou C, Bes M, Benito Y, Wolz C, Vandenesch F, Etienne J, Cheung AL. 2011.  $\beta$ -lactams interfering with PBP1 induce panton-valentine leukocidin expression by triggering *sarA* and *rot* global regulators of *Staphylococcus aureus*. *Antimicrob Agents Chemother* 55:3261-3271.
4. Mielich-Süss B, Wagner RM, Mietrach N, Hertlein T, Marincola G, Ohlsen K, Geibel S, Lopez D. 2017. Flotillin scaffold activity contributes to type VII secretion system assembly in *Staphylococcus aureus*. *PLoS Pathog* 13:e1006728.
5. Seidl K, Chen L, Bayer AS, Hady WA, Kreiswirth BN, Xiong YQ. 2011. Relationship of *agr* expression and function with virulence and vancomycin treatment outcomes in experimental endocarditis due to methicillin-resistant *Staphylococcus aureus*. *Antimicrob Agents Chemother* 55:5631-5639.
6. Sihto H-M, Tasara T, Stephan R, Johler S. 2014. Validation of reference genes for normalization of qPCR mRNA expression levels in *Staphylococcus aureus* exposed to osmotic and lactic acid stress conditions encountered during food production and preservation. *FEMS Microbiol Lett* 356:134-140.
